# Supplementary material for: Energetic transition metal complexes based on methyl carbazate and picric acid: syntheses, structures, physicochemical properties and catalysis on the thermal decomposition of ammonium perchlorate
Source: Royal Society of Chemistry journal article supplement (doi:10.1039/c9nj03591e), 2019-01-01
Supplement: c9nj03591e1.pdf [file c9nj03591e1.pdf]

# Electronic Supplementary Information

## **Energetic transition metal complexes based on methyl carbazate and picric acid: syntheses, structures, physicochemical properties and catalysis on the thermal decomposition of ammonium perchlorate**

Xiaoming Yang<sup>a</sup>, Yanna Wang<sup>a,b</sup>, Zhimin Li<sup>\*a</sup>, Jiang Du<sup>c</sup>, Lin Wang<sup>a</sup> and Tonglai Zhang<sup>\*a</sup>

<sup>a</sup> State Key Laboratory of Explosion Science and Technology, Beijing Institute of Technology, Beijing 100081, China.

<sup>b</sup> College of Chemistry and Chemical Engineering, Xingtai University, Xing tai 054001, China.

<sup>c</sup> North Automatic Control Technology Institute, Taiyuan 030006, China.

\*Corresponding author: Tonglai Zhang and Zhimin Li

Email:

Tonglai Zhang: [ztlbit@bit.edu.cn](mailto:ztlbit@bit.edu.cn)

Zhimin Li: [lizm@bit.edu.cn](mailto:lizm@bit.edu.cn)

Xiaoming Yang: [649726360@qq.com](mailto:649726360@qq.com)

## **Table of contents**

- 1. FT-IR spectra**
- 2. Crystal data and structure refinement details of compounds 1~7**
- 3. X-ray crystallography**
- 4. The stacking crystal structures of compounds 1~6**
- 5. The distances of hydrogen bonds of compounds 1~7**
- 6. Thermo-stability measurements (DSC and TGA)**
- 7. The first exothermic decomposition peak temperature with four heating rates**
- 8. Non-isothermal kinetics analysis**
- 9. The calculation of thermodynamics parameters**
- 10. References**

# 1. FT-IR spectra

FT-IR spectra of compounds 1~7.

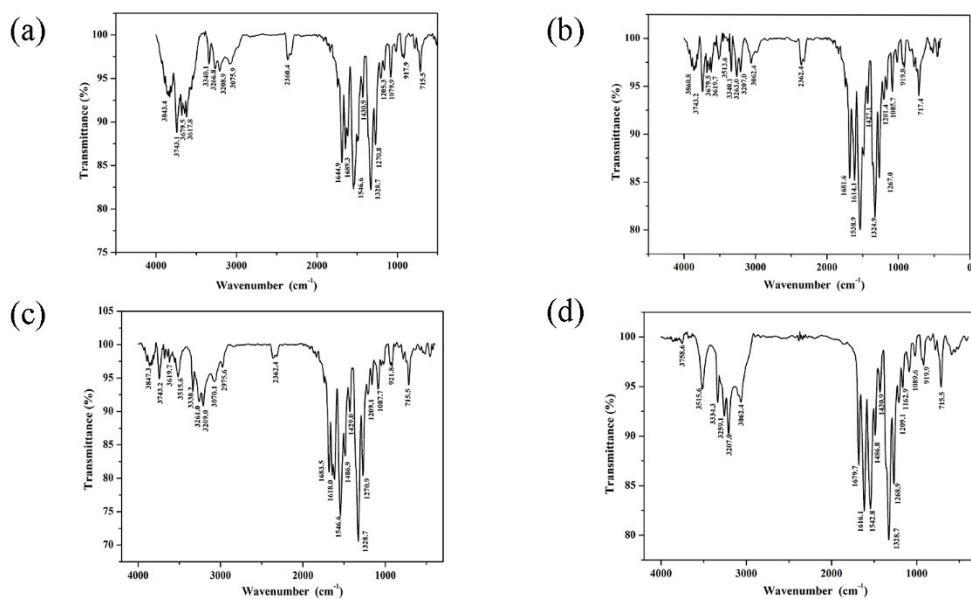

Fig. S1 The IR spectra of compounds 1-4

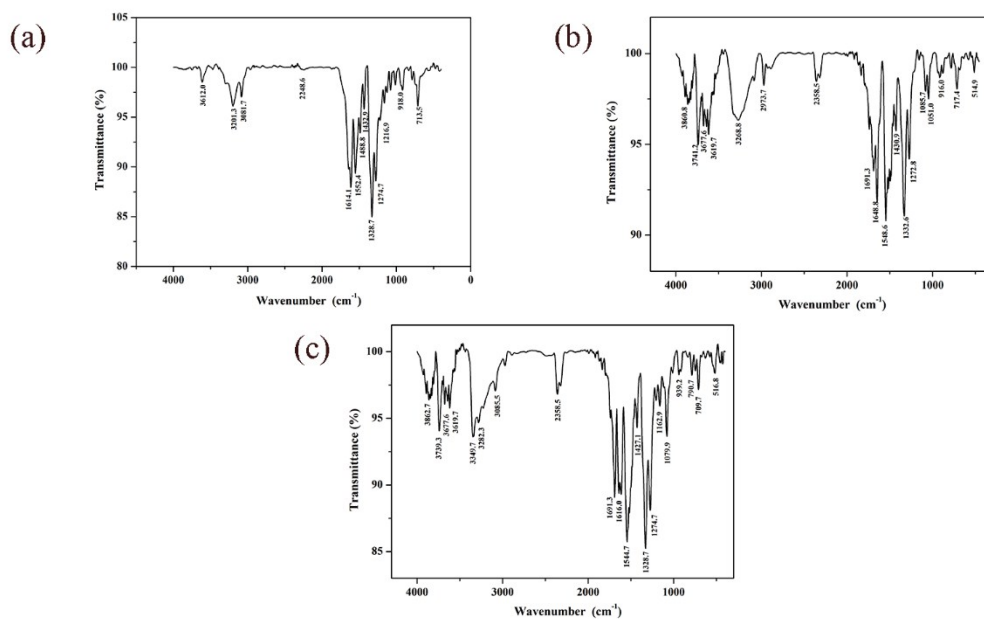

Fig. S2 The IR spectra of compounds 5-7

## 2. Crystal data and structure refinement details of compounds 1~7

Table S1 Crystallographic data for 1~7

|                                       | 1                                                                 | 2                                                                 | 3                                                                 | 4                                                                 | 5                                                                 | 6                                                                  | 7                                                                 |
|---------------------------------------|-------------------------------------------------------------------|-------------------------------------------------------------------|-------------------------------------------------------------------|-------------------------------------------------------------------|-------------------------------------------------------------------|--------------------------------------------------------------------|-------------------------------------------------------------------|
| Formula                               | C <sub>16</sub> H <sub>20</sub> MnN <sub>10</sub> O <sub>20</sub> | C <sub>16</sub> H <sub>20</sub> FeN <sub>10</sub> O <sub>20</sub> | C <sub>16</sub> H <sub>20</sub> CoN <sub>10</sub> O <sub>20</sub> | C <sub>16</sub> H <sub>20</sub> N <sub>10</sub> NiO <sub>20</sub> | C <sub>16</sub> H <sub>20</sub> CuN <sub>10</sub> O <sub>20</sub> | C <sub>16</sub> H <sub>20</sub> N <sub>10</sub> O <sub>20</sub> Zn | C <sub>16</sub> H <sub>30</sub> CdN <sub>10</sub> O <sub>25</sub> |
| Form. mass/g<br>mol <sup>-1</sup>     | 727.36                                                            | 728.27                                                            | 731.35                                                            | 731.13                                                            | 735.96                                                            | 737.79                                                             | 874.90                                                            |
| Temperature/K                         | 153.15                                                            | 153.15                                                            | 153.15                                                            | 153.15                                                            | 153.15                                                            | 153.15                                                             | 153.15                                                            |
| Crystal system                        | monoclinic                                                        | monoclinic                                                        | monoclinic                                                        | monoclinic                                                        | triclinic                                                         | triclinic                                                          | monoclinic                                                        |
| Space group                           | C2/c                                                              | C2/c                                                              | C2/c                                                              | C2/c                                                              | P-1                                                               | P-1                                                                | C2/c                                                              |
| a/Å                                   | 14.417 (3)                                                        | 14.392(3)                                                         | 14.361 (3)                                                        | 14.276 (3)                                                        | 7.1087 (14)                                                       | 7.1016                                                             | 12.551 (3)                                                        |
| b/Å                                   | 7.9325 (16)                                                       | 7.9132 (16)                                                       | 7.9175 (16)                                                       | 7.9662 (16)                                                       | 14.163 (3)                                                        | 7.9404 (16)                                                        | 8.5075 (17)                                                       |
| c/Å                                   | 24.414 (5)                                                        | 24.259 (5)                                                        | 24.317(5)                                                         | 24.212 (5)                                                        | 15.289 (3)                                                        | 12.364 (3)                                                         | 30.293 (6)                                                        |
| α°                                    | 90                                                                | 90                                                                | 90                                                                | 90                                                                | 112.32 (3)                                                        | 96.25(3)                                                           | 90                                                                |
| β°                                    | 101.44(3)                                                         | 101.34(3)                                                         | 101.49(3)                                                         | 101.04(3)                                                         | 100.42 (3)                                                        | 92.51(3)                                                           | 99.02(3)                                                          |
| γ°                                    | 90                                                                | 90                                                                | 90                                                                | 90                                                                | 103.26 (3)                                                        | 105.12 (3)                                                         | 90                                                                |
| Volume/Å <sup>3</sup>                 | 2736.5                                                            | 2708.9                                                            | 2709.5                                                            | 2702.5                                                            | 1323.2                                                            | 667.2                                                              | 3194.6                                                            |
| Z                                     | 4                                                                 | 4                                                                 | 4                                                                 | 4                                                                 | 2                                                                 | 1                                                                  | 4                                                                 |
| ρ <sub>calc</sub> /g cm <sup>-3</sup> | 1.766                                                             | 1.786                                                             | 1.793                                                             | 1.797                                                             | 1.847                                                             | 1.836                                                              | 1.819                                                             |
| μ/mm <sup>-1</sup>                    | 0.594                                                             | 0.669                                                             | 0.746                                                             | 0.831                                                             | 0.941                                                             | 1.035                                                              | 0.800                                                             |
| F(000)                                | 1484.0                                                            | 1488.0                                                            | 1492.0                                                            | 1496.0                                                            | 750.0                                                             | 376.0                                                              | 1776.0                                                            |
| Crystal<br>size/mm <sup>3</sup>       | 0.21 × 0.2 × 0.12                                                 | 0.23 × 0.2 × 0.19                                                 | 0.13 × 0.12 × 0.1                                                 | 0.23 × 0.2 × 0.17                                                 | 0.12 × 0.11 ×<br>0.08                                             | 0.21 × 0.2 × 0.15                                                  | 0.13 × 0.11 × 0.02                                                |
| λ(Mo Kα)/ Å                           | 0.71073                                                           | 0.71073                                                           | 0.71073                                                           | 0.71073                                                           | 0.71073                                                           | 0.71073                                                            | 0.71073                                                           |
| 2θ range /°                           | 6.088, 62.728                                                     | 5.774, 54.974                                                     | 5.904, 54.972                                                     | 5.816, 63.07                                                      | 3.344, 54.984                                                     | 5.356, 54.98                                                       | 5.446, 54.954                                                     |
| Reflections<br>collected              | 18765                                                             | 10572                                                             | 9140                                                              | 11532                                                             | 9808                                                              | 6521                                                               | 12527                                                             |
| Independent<br>reflections            | 4165                                                              | 3080                                                              | 3086                                                              | 4027                                                              | 5940                                                              | 3012                                                               | 3619                                                              |
| Data/restraints/<br>parameters        | 4165/0/214                                                        | 3080/0/214                                                        | 3086/0/214                                                        | 4027/0/214                                                        | 5940/0/425                                                        | 3012/18/225                                                        | 3619/0/237                                                        |
| Goodness-of-<br>fit on F <sup>2</sup> | 1.131                                                             | 1.112                                                             | 1.070                                                             | 1.082                                                             | 1.143                                                             | 1.068                                                              | 1.117                                                             |
| R1; wR2<br>[I ≥ 2σ(I)]                | 0.0541; 0.1274                                                    | 0.0427; 0.1009                                                    | 0.0397, 0.0973                                                    | 0.0551, 0.1232                                                    | 0.0842, 0.1541                                                    | 0.0432, 0.0916                                                     | 0.0442, 0.0895                                                    |
| R1; wR2 [all<br>data]                 | 0.0605; 0.1323                                                    | 0.0456, 0.1029                                                    | 0.0419, 0.0989                                                    | 0.0648, 0.1306                                                    | 0.1026, 0.1677                                                    | 0.0443, 0.0925                                                     | 0.0481, 0.0916                                                    |
| Resd. dens. (e<br>Å <sup>-3</sup> )   | 0.9/-0.61                                                         | 0.51/-0.49                                                        | 0.45/-0.41                                                        | 0.56/-0.69                                                        | 0.53/-0.88                                                        | 0.28/-0.49                                                         | 1.06/-0.83                                                        |
| CCDC                                  | 1881671                                                           | 1881672                                                           | 1881673                                                           | 1881674                                                           | 1882305                                                           | 1881675                                                            | 1881676                                                           |

### 3. X-ray crystallography

Table S2 Selected bond lengths (Å) and band angles (°) of compound **1**

| Selected bond lengths (Å) |                     |                     |
|---------------------------|---------------------|---------------------|
| Mn1-O9 2.1830(15)         | Mn1-O8 2.1382(16)   | Mn1-N4 2.2832(18)   |
| Selected band angles (°)  |                     |                     |
| O9-Mn1-O9 97.95 (9)       | O9-Mn1-N4 73.43(6)  | O9-Mn1-N4 85.24(6)  |
| O8-Mn1-O9 89.99(6)        | O8-Mn1-O9 172.00(6) | O8-Mn1-O8 82.09(9)  |
| O8-Mn1-N4 106.47(6)       | O8-Mn1-N4 98.02(6)  | N4-Mn1-N4 147.43(9) |

Table S3 Selected bond lengths (Å) and band angles (°) of compound **2**

| Selected bond lengths (Å) |                      |                      |
|---------------------------|----------------------|----------------------|
| Fe1-O9 2.1337(15)         | Fe1-O10 2.0921(15)   | Fe1-N5 2.2147(15)    |
| Selected band angles (°)  |                      |                      |
| N5-Fe1-O9 75.41(6)        | N5-Fe1-O10 105.87(6) | N5-Fe1-N5 151.06(10) |
| O9-Fe1-O9 95.76 (9)       | O10-Fe1-O9 172.37(6) | O10-Fe1-O10 80.54(8) |
| O10-Fe1-O9 91.86(6)       | O9-Fe1-N5 85.22(6)   | O10-Fe1-N5 96.20(6)  |

Table S4 Selected bond lengths (Å) and band angles (°) of compound **3**

| Selected bond lengths (Å) |                     |                     |
|---------------------------|---------------------|---------------------|
| Co1-O1 2.0635(14)         | Co1-O2 2.0994(14)   | Co1-N1 2.1602(17)   |
| Selected band angles (°)  |                     |                     |
| O1-Co1-O1 82.59(8)        | O1-Co1-O2 172.88(5) | O1-Co1-O2 90.29(6)  |
| O1-Co1-N1 95.18(6)        | O1-Co1-N1 103.53(6) | O2-Co1-O2 96.83 (8) |
| O2-Co1-N1 86.32(6)        | O2-Co1-N1 77.16(6)  | N1-Co1-N1 155.08(9) |

Table S5 Selected bond lengths (Å) and band angles (°) of compound **4**

| Selected bond lengths (Å) |                     |                      |
|---------------------------|---------------------|----------------------|
| Ni1-O1 2.0485(17)         | Ni1-O3 2.0390(17)   | Ni1-N1 2.107(17)     |
| Selected band angles (°)  |                     |                      |
| O1-Ni1-O1 94.72(10)       | O1-Ni1-N1 87.63(7)  | O1-Ni1-N1 79.36(7)   |
| O3-Ni1-O1 91.64(7)        | O3-Ni1-O1 173.57(7) | O3-Ni1-O3 82.0(1)    |
| O3-Ni1-N1 100.07(7)       | O3-Ni1-N1 94.42(7)  | N1-Ni1-N1 160.79(11) |

Table S6 Selected bond lengths (Å) and band angles (°) of compound **5**

| Selected bond lengths (Å) |                         |                       |
|---------------------------|-------------------------|-----------------------|
| Cu01-O9 1.933(3)          | Cu01-O10 2.297(3)       | Cu01-O11 2.390(4)     |
| Cu01-O12 1.980(3)         | Cu01-N5 2.004(4)        | Cu01-N6 2.019(4)      |
| Selected band angles (°)  |                         |                       |
| O9-Cu01-O10 82.81(13)     | O9-Cu01-O11 96.33(14)   | O9-Cu01-N5 83.28(15)  |
| O9-Cu01-N6 98.52(15)      | O10-Cu01-O11 177.91(13) | O12-Cu01-O9 178.01    |
| O12-Cu01-O10 95.54(14)    | O12-Cu01-O11 85.29(14)  | O12-Cu01-N5 95.54(15) |
| O12-Cu01-N6 82.64(15)     | N5-Cu01-O10 86.77(15)   | N5-Cu01-O11 91.24(15) |
| N5-Cu01-N6 178.06(16)     | N6-Cu01-O10 92.73(15)   | N6-Cu01-O11 89.27(15) |

Table S7 Selected bond lengths (Å) and band angles (°) of compound **6**

| Selected bond lengths (Å) |                     |                       |
|---------------------------|---------------------|-----------------------|
| Zn1-O8 2.0975(15)         | Zn1-O10 2.1116(15)  | Zn1-N5 2.1307(18)     |
| Selected band angles (°)  |                     |                       |
| O8-Zn1-O8 180.000         | O8-Zn1-O10 96.64(6) | O8-Zn1-O10 83.36(6)   |
| O8-Zn1-N5 79.60(6)        | O8-Zn1-N5 100.40(6) | O10-Zn1-O10 180.00(8) |
| O10-Zn1-N5 87.37(7)       | O10-Zn1-N5 92.63(7) | N5-Zn1-N5 180.000     |

Table S8 Selected bond lengths (Å) and band angles (°) of compound **7**

| Selected bond lengths (Å) |                        |                      |
|---------------------------|------------------------|----------------------|
| Cd1-O1 2.426(2)           | Cd1-O11 2.270(2)       | Cd1-O11 2.269(2)     |
| Cd1-O12 2.457(3)          | Cd1-N2 2.363(3)        |                      |
| Selected band angles (°)  |                        |                      |
| O1-Cd1-O1 71.83(10)       | O1-Cd1-O12 144.08(5)   | O11-Cd1-O1 89.45(8)  |
| O11-Cd1-O1 86.64(8)       | O11-Cd1-O11 175.18(13) | O11-Cd1-O12 92.41(6) |
| O11-Cd1-N2 96.86(9)       | O11-Cd1-N2 84.39(9)    | N2-Cd1-O1 140.70(8)  |
| N2-Cd1-O1 69.09(8)        | N2-Cd1-O12 75.09(6)    | N2-Cd1-N2 150.17(13) |

#### 4. The stacking crystal structures of compounds 1~6

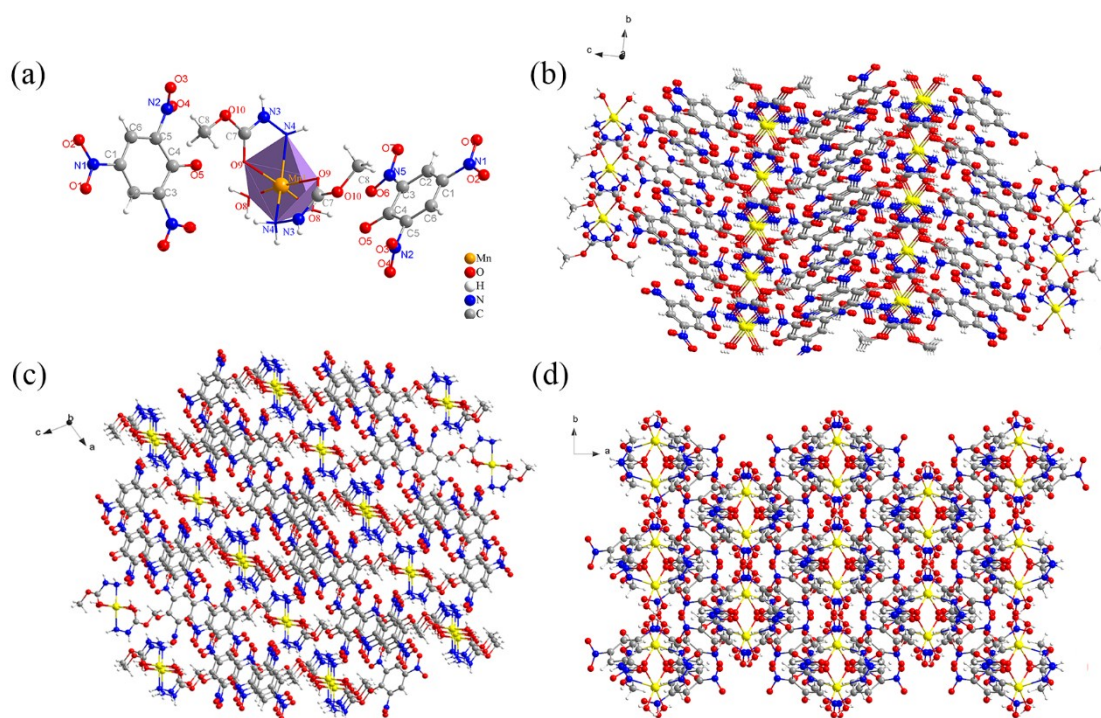

Fig. S3 (a) A view of the molecular unit of compound **1**. (b) The stacking crystal structure of compound **1** viewed down the *a* axis. (c) The stacking crystal structure of compound **1** viewed down the *b* axis. (d) The stacking crystal structure of compound **1** viewed down the *c* axis.

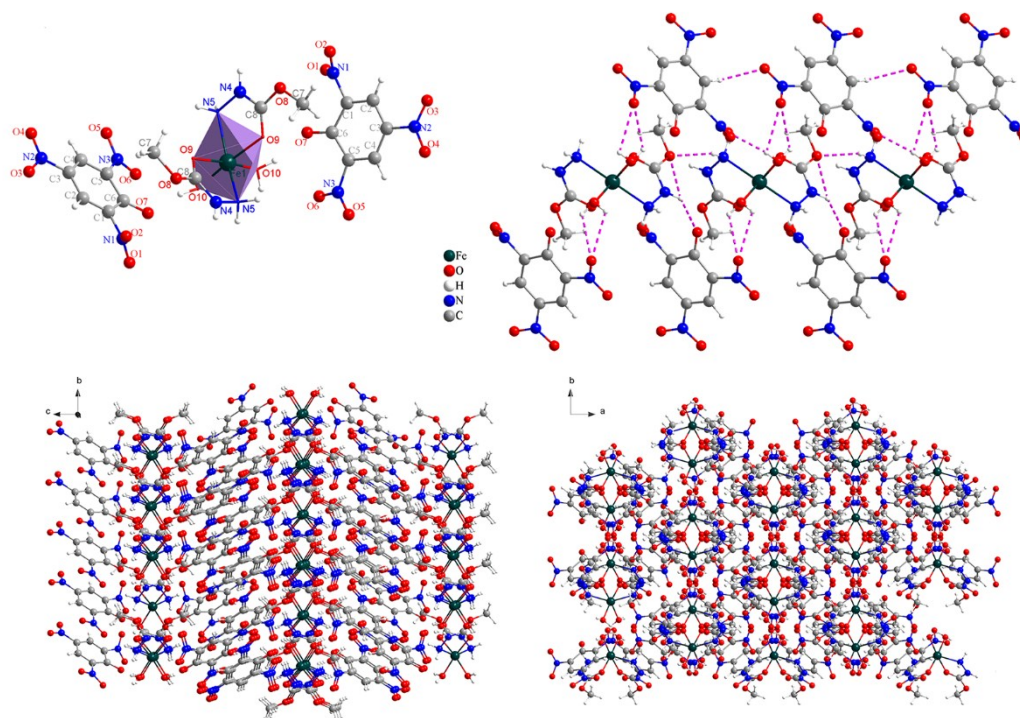

Fig. S4 (a) A view of the molecular unit of compound **2**. (b) The stacking crystal structure of compound **2** viewed down the *a* axis, the dashed lines indicate hydrogen bonding. (c) The stacking crystal structure of compound **2** viewed down the *b* axis. (d) The stacking crystal structure of compound **2** viewed down the *c* axis.

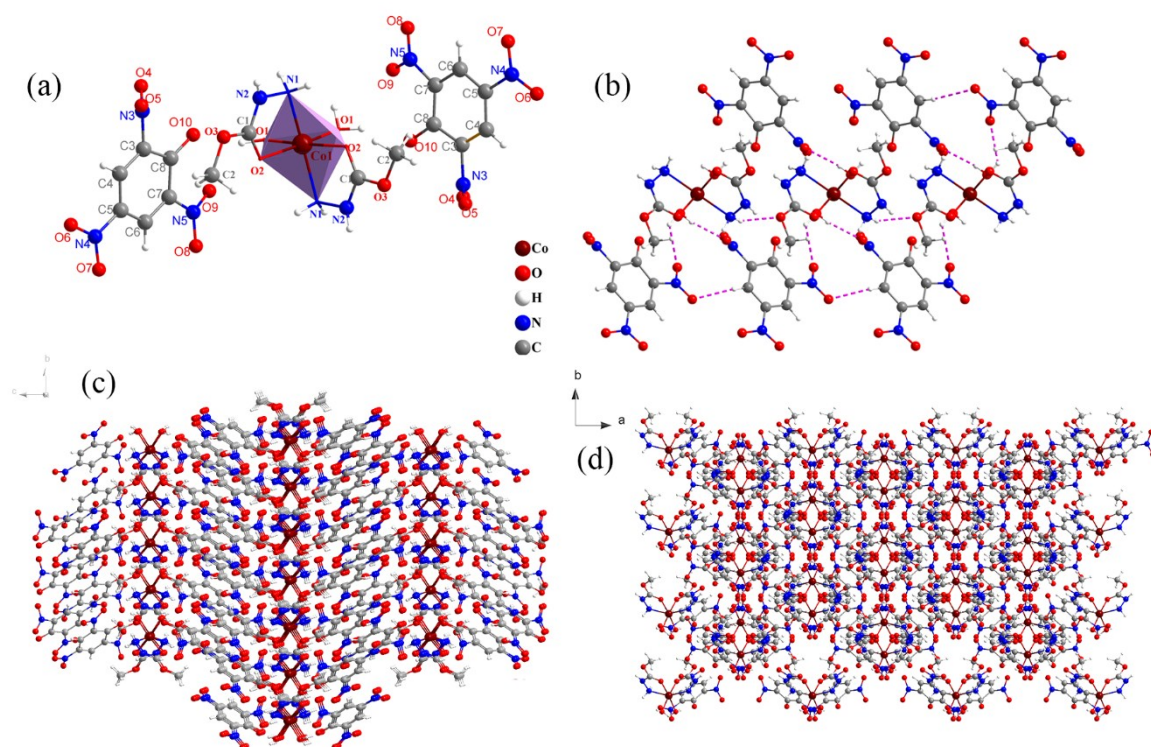

Fig. S5 (a) A view of the molecular unit of compound **3**. (b) The stacking crystal structure of compound **3** viewed down the *a* axis, the dashed lines indicate hydrogen bonding. (c) The stacking crystal structure of compound **3** viewed down the *b* axis. (d) The stacking crystal structure of compound **3** viewed down the *c* axis.



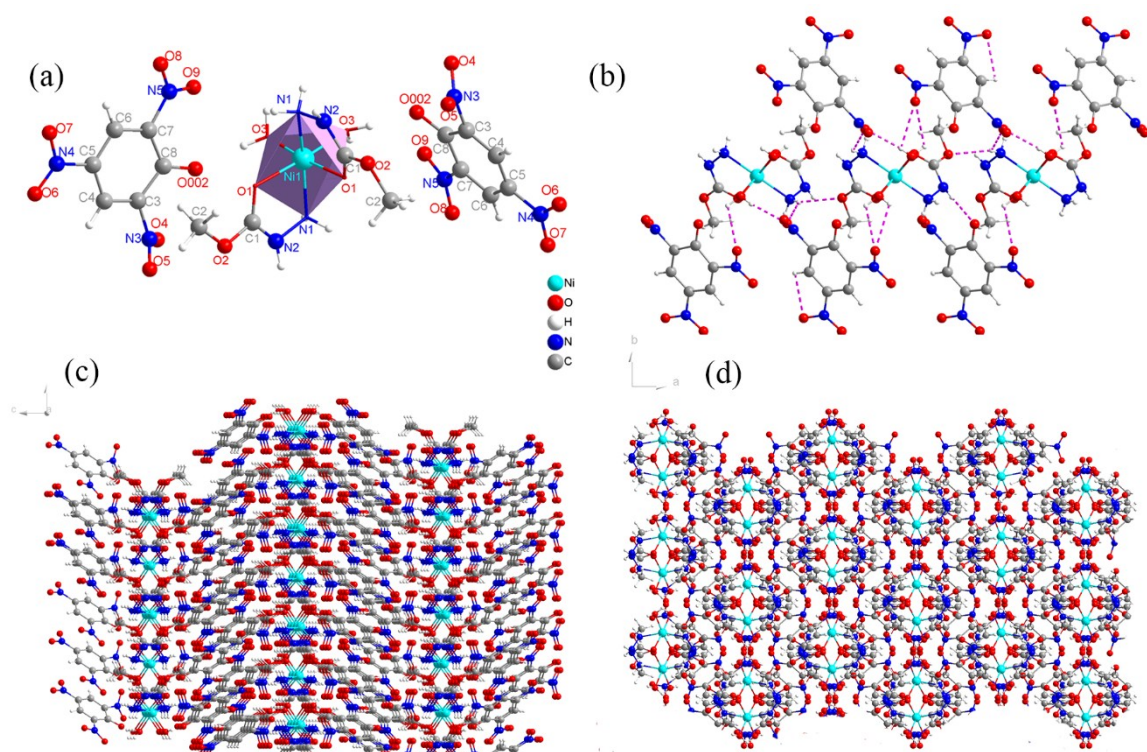

Fig. S6 (a) A view of the molecular unit of compound **4**. (b) The stacking crystal structure of compound **4** viewed down the *b* axis, the dashed lines indicate hydrogen bonding. (c) The stacking crystal structure of compound **4** viewed down the *a* axis. (d) The stacking crystal structure of compound **4** viewed down the *c* axis.

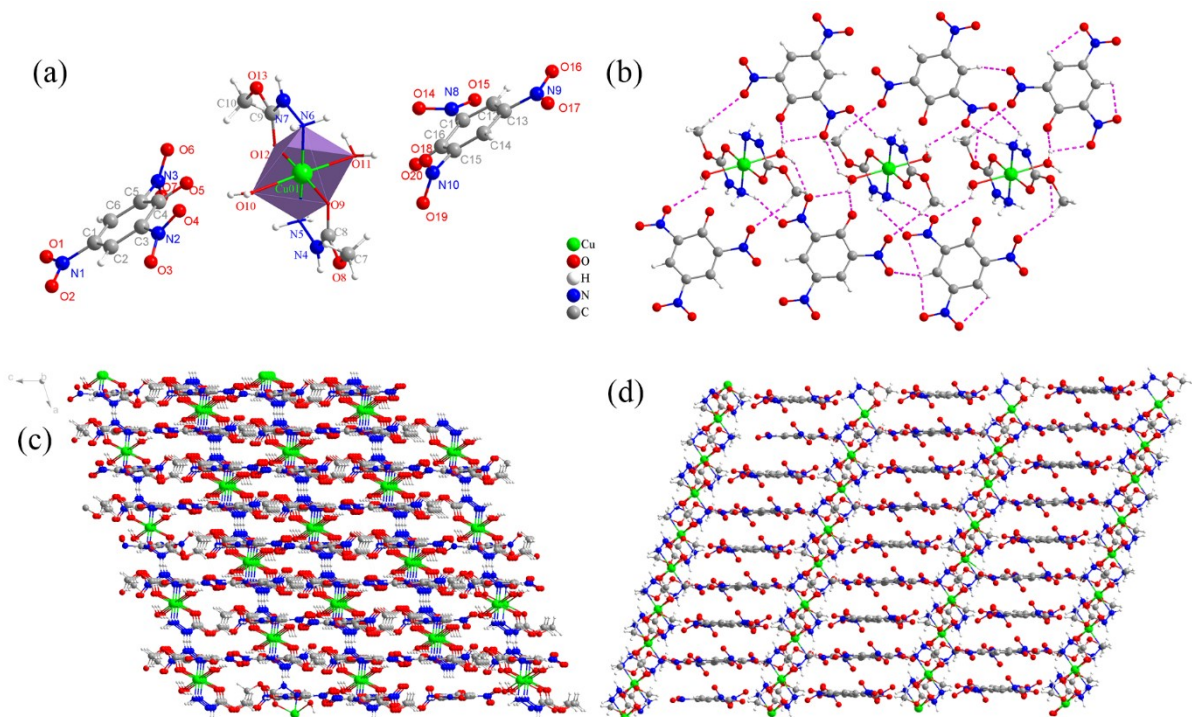

Fig. S7 (a) A view of the molecular unit of compound **5**. (b) The stacking crystal structure of compound **5** viewed down the *a* axis, the dashed lines indicate hydrogen bonding. (c) The stacking crystal structure of compound **5** viewed down the *b* axis. (d) The stacking crystal structure of compound **5** viewed down the *c* axis.



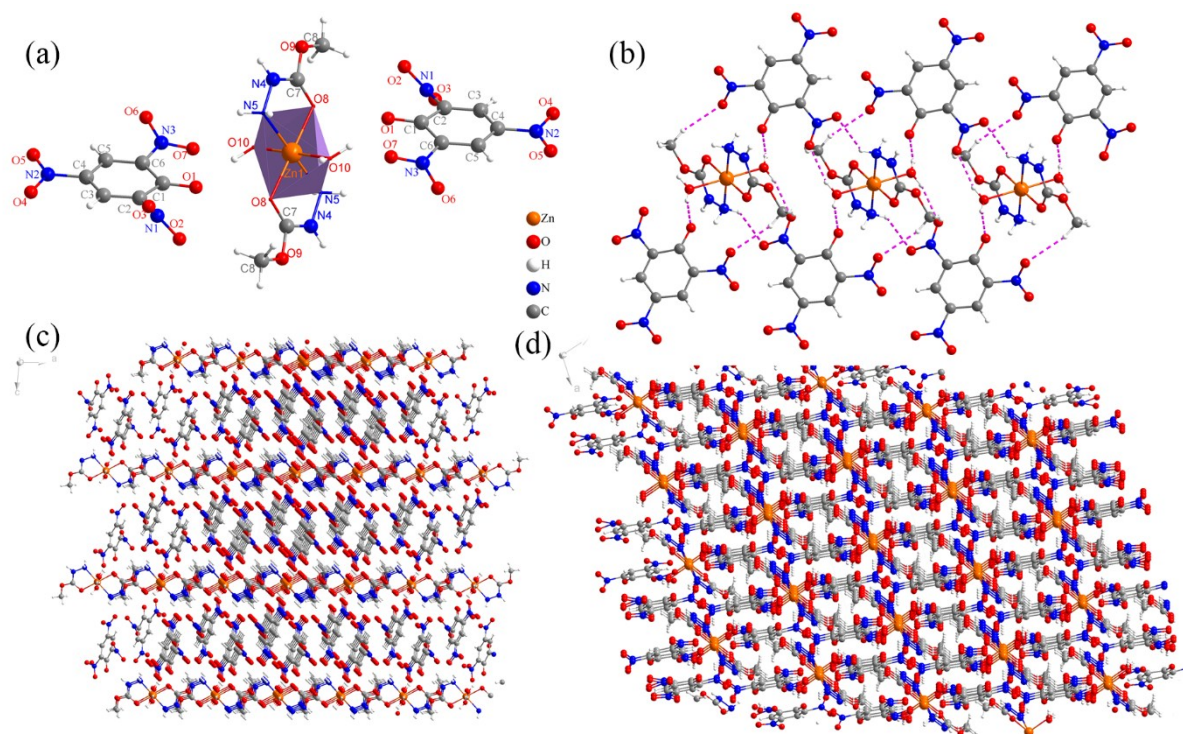

Fig. S8 (a) A view of the molecular unit of compound **6**. (b) The stacking crystal structure of compound **6** viewed down the *a* axis, the dashed lines indicate hydrogen bonding. (c) The stacking crystal structure of compound **6** viewed down the *b* axis. (d) The stacking crystal structure of compound **6** viewed down the *c* axis.

## 5. The distances of hydrogen bonds of compounds 1~7

Table S9 The distances of hydrogen bonds of compounds 1~7

| [Mn(MCZ) <sub>2</sub> (H <sub>2</sub> O) <sub>2</sub> ] <sub>2</sub> PA <sub>2</sub> ( <b>1</b> ) |        |        |        |        |
|---------------------------------------------------------------------------------------------------|--------|--------|--------|--------|
| N3--H3...O5                                                                                       | 0.8800 | 2.1600 | 2.9143 | 144.00 |
| N4--H4A...O1                                                                                      | 0.9100 | 2.2200 | 3.0961 | 162.00 |
| N4--H4B...O3                                                                                      | 0.9100 | 2.4100 | 3.0391 | 126.00 |
| N4--H4B...O10                                                                                     | 0.9100 | 2.3000 | 3.1051 | 147.00 |
| O8--H8A...O5                                                                                      | 0.8400 | 1.8400 | 2.6703 | 171.00 |
| O8--H8A...O6                                                                                      | 0.8400 | 2.4500 | 2.8795 | 112.00 |
| O8--H8B...O6                                                                                      | 0.8400 | 2.5600 | 2.8795 | 104.00 |
| O8--H8B...O3                                                                                      | 0.8400 | 2.2000 | 2.9140 | 144.00 |
| C2--H2...O7                                                                                       | 0.9500 | 2.3300 | 2.6568 | 100.00 |
| C6--H6...O7                                                                                       | 0.9500 | 2.5000 | 3.4187 | 163.00 |
| [Fe(MCZ) <sub>2</sub> (H <sub>2</sub> O) <sub>2</sub> ] <sub>2</sub> PA <sub>2</sub> ( <b>2</b> ) |        |        |        |        |
| N4--H4A...O7                                                                                      | 0.8800 | 2.1900 | 2.9245 | 141.00 |
| N5--H5A...O2                                                                                      | 0.9100 | 2.3400 | 2.9909 | 128.00 |
| N5--H5A...O8                                                                                      | 0.9100 | 2.3400 | 3.1215 | 144.00 |
| N5--H5B...O4                                                                                      | 0.9100 | 2.2000 | 3.0891 | 164.00 |
| O10--H10A...O6                                                                                    | 0.8400 | 2.4300 | 2.9063 | 117.00 |
| O10--H10A...O7                                                                                    | 0.8400 | 1.8300 | 2.6540 | 165.00 |
| O10--H10B...O6                                                                                    | 0.8400 | 2.5200 | 2.9063 | 109.00 |
| O10--H10B...O2                                                                                    | 0.8400 | 2.1300 | 2.8865 | 150.00 |

|              |        |        |        |        |
|--------------|--------|--------|--------|--------|
| C2--H2...O5  | 0.9500 | 2.4800 | 3.4076 | 164.00 |
| C4--H4...O5  | 0.9500 | 2.3200 | 2.6532 | 100.00 |
| C7--H7A...O6 | 0.9800 | 2.5900 | 3.0095 | 106.00 |

---

[Co(MCZ)<sub>2</sub>(H<sub>2</sub>O)<sub>2</sub>]<sub>2</sub>PA<sub>2</sub>(3)

---

|                 |        |        |        |        |
|-----------------|--------|--------|--------|--------|
| N4--H4...O5     | 0.8800 | 1.9700 | 2.7931 | 155.00 |
| N4--H4...O6     | 0.8800 | 2.4500 | 3.0091 | 122.00 |
| N5--H5A...O16   | 0.9100 | 2.1500 | 3.0375 | 164.00 |
| N5--H5A...O15   | 0.9100 | 2.5700 | 3.0618 | 115.00 |
| N5--H5B...O14   | 0.9100 | 2.2600 | 3.0173 | 141.00 |
| N6--H6A...O19   | 0.9100 | 2.5900 | 2.9859 | 107.00 |
| N6--H6A...O3    | 0.9100 | 2.1900 | 2.9553 | 141.00 |
| N6--H6B...O1    | 0.9100 | 2.4000 | 3.2196 | 150.00 |
| N6--H6B...O2    | 0.9100 | 2.5200 | 3.3209 | 147.00 |
| N7--H7...O19    | 0.8800 | 2.4700 | 2.9822 | 118.00 |
| N7--H7...O20    | 0.8800 | 1.9800 | 2.8032 | 156.00 |
| O10--H10A...O4  | 0.8400 | 2.5900 | 2.9983 | 111.00 |
| O10--H10A...O4  | 0.8400 | 2.3400 | 2.9982 | 136.00 |
| O10--H10B...O4  | 0.8400 | 2.4800 | 2.9983 | 121.00 |
| O10--H10B...O5  | 0.8400 | 1.9600 | 2.7619 | 160.00 |
| O11--H11A...O14 | 0.8400 | 2.5100 | 2.9697 | 116.00 |
| O11--H11A...O20 | 0.8400 | 1.9000 | 2.7208 | 167.00 |
| C7--H7B...O19   | 0.9800 | 2.4600 | 3.4047 | 161.00 |
| C7--H7C...O17   | 0.9800 | 2.4400 | 2.7918 | 101.00 |
| C10--H10C...O1  | 0.9800 | 2.5200 | 3.1132 | 119.00 |
| C10--H10C...O14 | 0.9800 | 2.5600 | 3.3211 | 134.00 |
| C10--H10E...O6  | 0.9800 | 2.4900 | 3.4240 | 159.00 |
| C12--H12...O7   | 0.9500 | 2.5700 | 3.2413 | 128.00 |

---

[Ni(MCZ)<sub>2</sub>(H<sub>2</sub>O)<sub>2</sub>]<sub>2</sub>PA<sub>2</sub>(4)

---

|                |        |        |        |        |
|----------------|--------|--------|--------|--------|
| N1--H1A...O5   | 0.8500 | 2.3000 | 2.9174 | 129.00 |
| N1--H1B...O7   | 0.8500 | 2.2500 | 3.0796 | 167.00 |
| N2--H2...O002  | 0.8500 | 2.0900 | 2.9347 | 173.00 |
| N2--H2...O4    | 0.8500 | 2.5500 | 2.9648 | 111.00 |
| O3--H3A...O9   | 0.8400 | 2.5600 | 2.9412 | 109.00 |
| O3--H3A...O5   | 0.8400 | 2.1200 | 2.8765 | 150.00 |
| O3--H3B...O002 | 0.8400 | 1.8100 | 2.6513 | 175.00 |
| O3--H3B...O9   | 0.8400 | 2.5600 | 2.9412 | 109.00 |
| C4--H4...O8    | 0.9500 | 2.4400 | 3.3640 | 163.00 |

---

[Cu(MCZ)<sub>2</sub>(H<sub>2</sub>O)<sub>2</sub>]<sub>2</sub>PA<sub>2</sub>(5)

---

|               |        |        |        |        |
|---------------|--------|--------|--------|--------|
| N4--H4...O5   | 0.8800 | 1.9700 | 2.7931 | 155.00 |
| N4--H4...O6   | 0.8800 | 2.4500 | 3.0091 | 122.00 |
| N5--H5A...O16 | 0.9100 | 2.1500 | 3.0375 | 164.00 |
| N5--H5A...O15 | 0.9100 | 2.5700 | 3.0618 | 115.00 |
| N5--H5B...O14 | 0.9100 | 2.2600 | 3.0173 | 141.00 |
| N6--H6A...O19 | 0.9100 | 2.5900 | 2.9859 | 107.00 |

|                                                                                           |        |        |        |        |
|-------------------------------------------------------------------------------------------|--------|--------|--------|--------|
| N6--H6A...O3                                                                              | 0.9100 | 2.1900 | 2.9553 | 141.00 |
| N6--H6B...O1                                                                              | 0.9100 | 2.4000 | 3.2196 | 150.00 |
| N6--H6B...O2                                                                              | 0.9100 | 2.5200 | 3.3209 | 147.00 |
| N7--H7...O19                                                                              | 0.8800 | 2.4700 | 2.9822 | 118.00 |
| N7--H7...O20                                                                              | 0.8800 | 1.9800 | 2.8032 | 156.00 |
| O10--H10A...O4                                                                            | 0.8400 | 2.5900 | 2.9983 | 111.00 |
| O10--H10A...O4                                                                            | 0.8400 | 2.3400 | 2.9982 | 136.00 |
| O10--H10B...O4                                                                            | 0.8400 | 2.4800 | 2.9983 | 121.00 |
| O10--H10B...O5                                                                            | 0.8400 | 1.9600 | 2.7619 | 160.00 |
| O11--H11A...O14                                                                           | 0.8400 | 2.5100 | 2.9697 | 116.00 |
| O11--H11A...O20                                                                           | 0.8400 | 1.9000 | 2.7208 | 167.00 |
| C7--H7B...O19                                                                             | 0.9800 | 2.4600 | 3.4047 | 161.00 |
| C7--H7C...O17                                                                             | 0.9800 | 2.4400 | 2.7918 | 101.00 |
| C10--H10C...O1                                                                            | 0.9800 | 2.5200 | 3.1132 | 119.00 |
| C10--H10C...O14                                                                           | 0.9800 | 2.5600 | 3.3211 | 134.00 |
| C10--H10E...O6                                                                            | 0.9800 | 2.4900 | 3.4240 | 159.00 |
| C12--H12c...O7                                                                            | 0.9500 | 2.5700 | 3.2413 | 128.00 |
| <b>[Zn(MCZ)<sub>2</sub>(H<sub>2</sub>O)<sub>2</sub>]PA<sub>2</sub>(6)</b>                 |        |        |        |        |
| N4--H4...O1                                                                               | 0.8500 | 1.9800 | 2.8124 | 167.00 |
| N5--H5A...O5                                                                              | 0.8500 | 2.3500 | 3.1685 | 162.00 |
| N5--H5B...O6                                                                              | 0.8500 | 2.3400 | 2.8846 | 122.00 |
| O10--H10A...O7                                                                            | 0.8400 | 2.1600 | 2.9443 | 155.00 |
| O10--H10B...O1                                                                            | 0.8400 | 1.8400 | 2.6626 | 166.00 |
| O10--H10B...O7                                                                            | 0.8400 | 2.4000 | 2.8864 | 117.00 |
| C8--H8B...O4                                                                              | 0.9800 | 2.4400 | 2.9121 | 109.00 |
| C8--H8C...O2                                                                              | 0.9800 | 2.5300 | 3.4603 | 159.00 |
| <b>[Cd(MCZ)<sub>2</sub>(H<sub>2</sub>O)<sub>3</sub>]PA<sub>2</sub>·4H<sub>2</sub>O(7)</b> |        |        |        |        |
| N1--H1...O3                                                                               | 0.8500 | 2.1800 | 3.0183 | 168.00 |
| N1--H1...O5                                                                               | 0.8500 | 2.5900 | 3.0044 | 111.00 |
| N2--H2A...O10                                                                             | 0.8400 | 2.1800 | 2.9374 | 150.00 |
| N2--H2B...O6                                                                              | 0.8400 | 2.2800 | 3.1000 | 165.00 |
| O10--H10A...O9                                                                            | 0.8400 | 1.9300 | 2.7592 | 171.00 |
| O10--H10B...O5                                                                            | 0.8400 | 1.9900 | 2.7853 | 158.00 |
| O11--H11A...O13                                                                           | 0.8400 | 1.8900 | 2.7174 | 170.00 |
| O11--H11B...O6                                                                            | 0.8400 | 2.4400 | 3.0524 | 130.00 |
| O11--H11B...O9                                                                            | 0.8400 | 2.0800 | 2.8381 | 150.00 |
| O12--H12...O13                                                                            | 0.8400 | 2.0400 | 2.8427 | 159.00 |
| O13--H13A...O1                                                                            | 0.8400 | 1.9800 | 2.8161 | 171.00 |
| O13--H13B...O10                                                                           | 0.8400 | 1.8800 | 2.7115 | 170.00 |
| C2--H2D...O4                                                                              | 0.9800 | 2.3600 | 3.2872 | 157.00 |

## 6. Thermo-stability measurements (DSC and TGA)

Furthermore, all of these compounds were investigated by thermal gravimetric analysis (TGA). What is noteworthy is

that the measurement of TG is under dry oxygen-free nitrogen atmosphere that different with DSC. The deviation of decomposition temperature is within acceptable scopes.

The TGA measurements revealed the same decomposition process. In addition, the decomposition residue amounts to only 8.5 % and 6.7 % for **2** and **3**, respectively. That is almost equal to its own metal content, this indicates that all nonmetallic substances transformed into gaseous products.

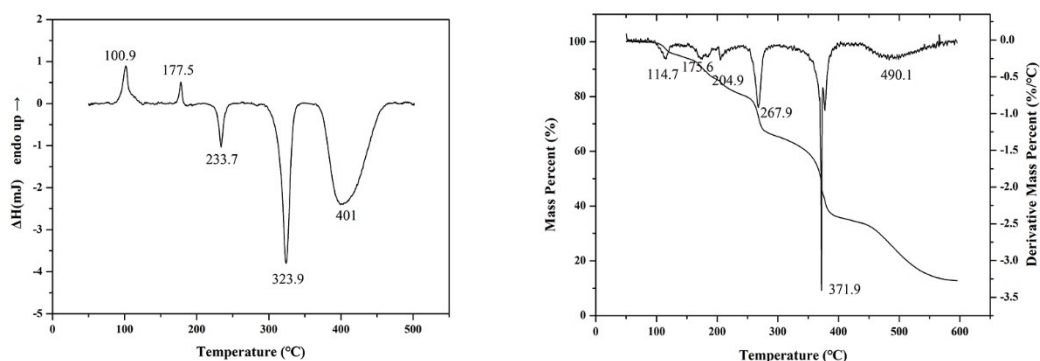

Fig. S9 The DSC and TG-DTG curves of compound **1** with a scanning rate of 10 K min<sup>-1</sup>.

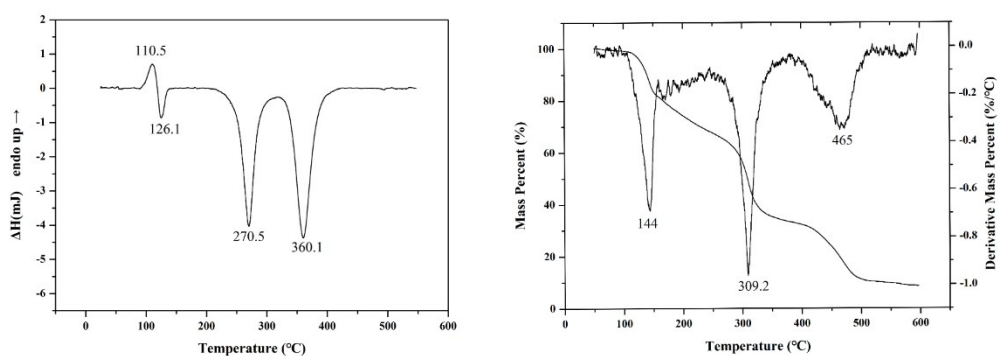

Fig. S10 The DSC and TG-DTG curves of compound **2** with a scanning rate of 10 K min<sup>-1</sup>.

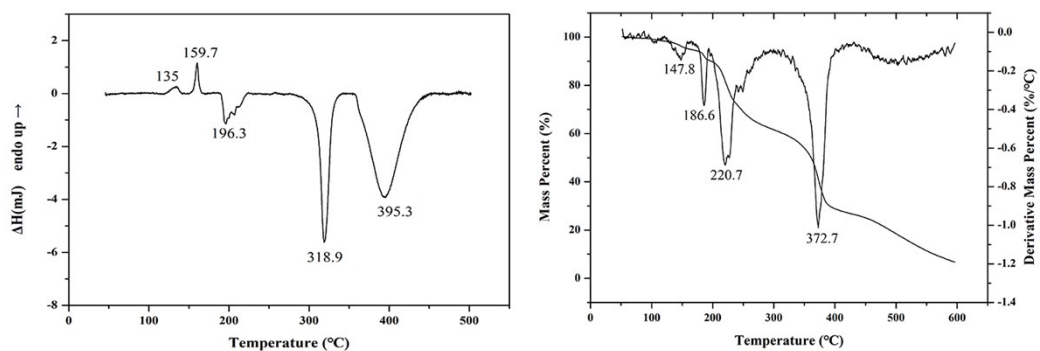

Fig. S11 The DSC and TG-DTG curves of compound **3** with a scanning rate of 10 K min<sup>-1</sup>.

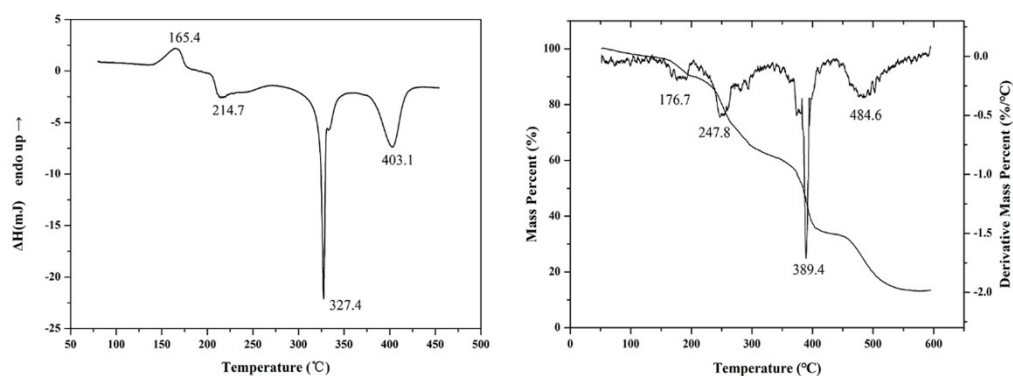

Fig. S12 The DSC and TG-DTG curves of compound **4** with a scanning rate of 10 K min<sup>-1</sup>.

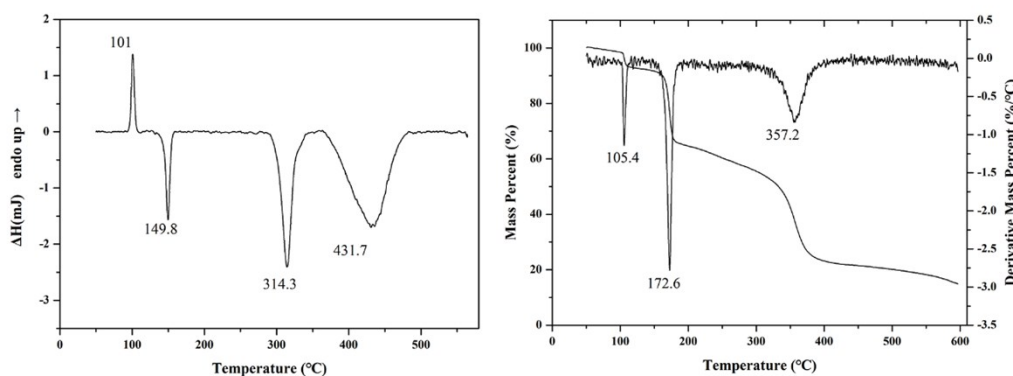

Fig. S13 The DSC and TG-DTG curves of compound **5** with a scanning rate of 10 K min<sup>-1</sup>.

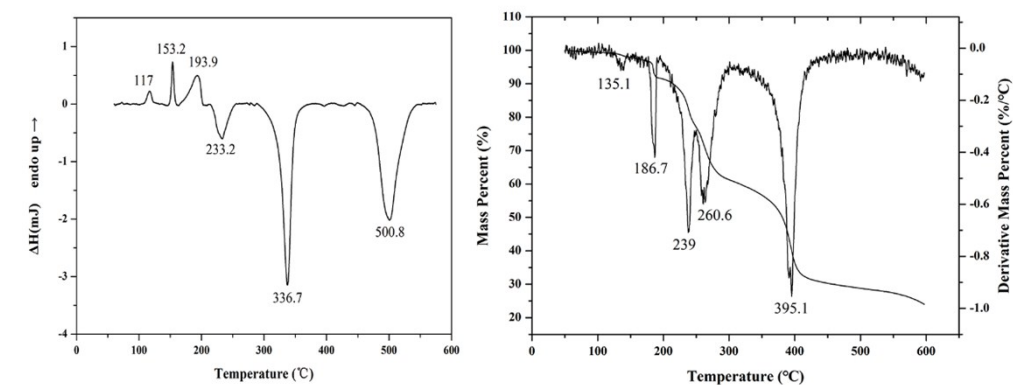

Fig. S14 The DSC and TG-DTG curves of compound **6** with a scanning rate of 10 K min<sup>-1</sup>.

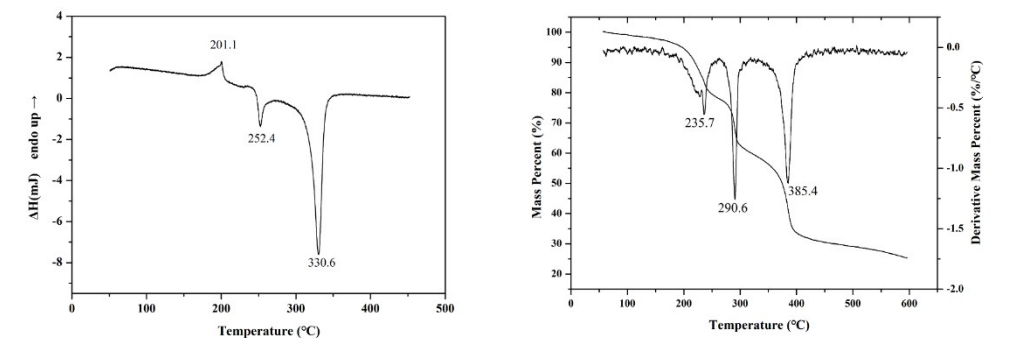

Fig. S15 The DSC and TG-DTG curves of compound **7** with a scanning rate of 10 K min<sup>-1</sup>.



## 7. The first exothermic decomposition peak temperature with four heating rates

Table S10 The first exothermic decomposition peak temperature  $T_p$  with four heating rates ( $\beta=5, 10, 15, 20 \text{ K min}^{-1}$ )

| $\beta \text{ (K min}^{-1}\text{)}$ | Peaks temperatures $T_p \text{ (K)}$ |        |        |        |        |        |        |
|-------------------------------------|--------------------------------------|--------|--------|--------|--------|--------|--------|
|                                     | 1                                    | 2      | 3      | 4      | 5      | 6      | 7      |
| 5                                   | 498.25                               | 393.85 | 461.45 | 478.85 | 420.85 | 493.35 | 515.95 |
| 10                                  | 506.85                               | 399.25 | 469.45 | 487.85 | 422.95 | 506.35 | 525.55 |
| 15                                  | 508.45                               | 406.65 | 471.75 | 492.15 | 428.05 | 513.25 | 526.15 |
| 20                                  | 509.15                               | 408.15 | 473.55 | 494.15 | 430.05 | 513.55 | 527.05 |

## 8. Non-isothermal kinetics analysis

The peak temperatures of first decomposition processes were used to calculate kinetics parameters (apparent activation energies ( $E_a$ ) and the pre-exponential factor ( $A$ )), by Kissinger's method<sup>[1]</sup> (Eq. (1)) and Ozawa-Doyle's method<sup>[2]</sup> (Eq. (2)).

$$\ln \frac{\beta}{T_p^2} = \ln \left( \frac{AR}{E_a} \right) - \frac{E_a}{RT_p} \quad (1)$$

$$\ln \beta + 0.4567 \frac{E_a}{RT_p} = C \quad (2)$$

Where  $T_p$  is the peak temperature (K) of first reaction process (see in Table S8),  $A$  is the pre-exponential factor ( $\text{s}^{-1}$ ),  $E_a$  is the apparent activation energy ( $\text{kJ mol}^{-1}$ ),  $R$  is the gas constant ( $\text{J mol}^{-1} \text{K}^{-1}$ ),  $\beta$  is the heating rate ( $\text{K min}^{-1}$ ) and  $C$  is a constant. The results are listed in Table S11. The symbol "S" stands for the standard deviation.  $E_a$  is equal to the average of  $E_k$  and  $E_o$ .

Table S11 Non-isothermal reaction kinetics parameters.

| compound | Kissinger's method |           |       | Ozawa's method |       | $E_a$ |
|----------|--------------------|-----------|-------|----------------|-------|-------|
|          | $E_K$              | $\lg A_K$ | $R_K$ | $E_O$          | $R_O$ |       |
| 1        | 231.1              | 22.2      | -0.95 | 227.7          | -0.95 | 229.4 |
| 2        | 111.8              | 12.7      | -0.98 | 112.7          | -0.98 | 112.3 |
| 3        | 193.3              | 19.8      | -0.98 | 191.2          | -0.98 | 192.3 |
| 4        | 159.7              | 15.3      | -0.99 | 159.5          | -0.99 | 159.6 |
| 5        | 194.9              | 22.3      | -0.96 | 192.1          | -0.96 | 193.5 |
| 6        | 122.6              | 10.7      | -0.97 | 124.5          | -0.98 | 123.6 |
| 7        | 234.5              | 21.7      | -0.92 | 231.2          | -0.93 | 232.9 |

## 9. The calculation of thermodynamics parameters

The thermodynamics parameters ( $T_{p0}$ ,  $T_b$ ,  $\Delta S^\ddagger$ ,  $\Delta H^\ddagger$ ,  $\Delta G^\ddagger$ ) were obtained by the Zhang's calculation equations<sup>[3]</sup> 3~7 and the results listed in Table S12. The equations for these calculations are as follows:

$$T_{pi} = T_{p0} + a\beta + b\beta^2 + c\beta^3 \quad (3)$$

$$T_b = (E_K - \sqrt{E_K^2 - 4E_K RT_{p0}}) / 2R \quad (4)$$

$$A = (k_B T_{p0} / h) \exp \left( \frac{E_a}{RT_{p0}} \right) (1 + \Delta S^\ddagger / R) \quad (5)$$

$$\Delta H^\ddagger = E_K - RT_{p0} \quad (6)$$

$$\Delta G^\ddagger = \Delta H^\ddagger - T_{p0} \Delta S^\ddagger \quad (7)$$

Where  $a$ ,  $b$  and  $c$  are coefficients,  $k_B$  is the Boltzmann constant ( $1.381 \times 10^{-23} \text{ J K}^{-1}$ ) and  $h$  is the Planck constant ( $6.626 \times 10^{-34} \text{ J s}$ ).  $T_{p0}$  is the values of the peak temperature corresponding to  $\beta \rightarrow 0$ ,  $T_b$  is the corresponding critical temperature of thermal explosion,  $\Delta S^\ddagger$  is the entropy of activation,  $\Delta H^\ddagger$  is the enthalpy of activation, and  $\Delta G^\ddagger$  is the free energy of activation.

Table S12 Calculation of critical temperatures of thermal explosion,  $\Delta S^\ddagger$ ,  $\Delta H^\ddagger$  and  $\Delta G^\ddagger$ 

| compound | $T_{p0}/K$ | $T_b/K$ | $\Delta S^\ddagger/J K^{-1} mol^{-1}$ | $\Delta H^\ddagger/kJ mol^{-1}$ | $\Delta G^\ddagger/kJ mol^{-1}$ |
|----------|------------|---------|---------------------------------------|---------------------------------|---------------------------------|
| <b>1</b> | 476.6      | 485.0   | 176.2                                 | 227.1                           | 143.2                           |
| <b>2</b> | 384.5      | 396.2   | -3.9                                  | 108.6                           | 110.1                           |
| <b>3</b> | 442.6      | 451.4   | 130.9                                 | 189.6                           | 131.7                           |
| <b>4</b> | 462.8      | 474.5   | 44.3                                  | 155.9                           | 135.3                           |
| <b>5</b> | 417.2      | 424.9   | 179.2                                 | 191.4                           | 116.7                           |
| <b>6</b> | 474.8      | 491.2   | -43.9                                 | 118.7                           | 139.5                           |
| <b>7</b> | 488.1      | 496.9   | 166.4                                 | 230.4                           | 149.2                           |

## References

1. H. E. Kissinger, *Anal Chem*, 1957, 29, 1702-1706.
2. T. Ozawa, *Bull.chem.soc.jpn*, 1965, 38, 1881-1886.
3. T. Zhang, R. Hu, X. Yi and F. Li, *Thermochim Acta*, 1994, 244, 171-176.
